# Supplementary material for: Biomanufacturing of CdS quantum dots
Source: Royal Society of Chemistry journal article supplement (doi:10.1039/c5gc00194c), 2015-01-01
Supplement: c5gc00194c1.pdf [file c5gc00194c1.pdf]

### Supplementary Materials:

This file includes:

**Table S1. Comparison of different growth conditions for CdS quantum dot formation**

**Figure S1. Purification of biosynthetic QDs and comparison with control cell lysates**

**Table S1. Comparison of different growth conditions for CdS quantum dot formation.**

| Ingredient                       | Sample 1                                                                            | Sample 2                                                                            | Sample 3                                                                            | Sample 4                                                                             | Sample 5                                                                              | Sample 6                                                                              |
|----------------------------------|-------------------------------------------------------------------------------------|-------------------------------------------------------------------------------------|-------------------------------------------------------------------------------------|--------------------------------------------------------------------------------------|---------------------------------------------------------------------------------------|---------------------------------------------------------------------------------------|
| SMCD1 [OD <sub>600</sub> ]       | 0.5                                                                                 | 0.5                                                                                 | 0.5                                                                                 | 0.5                                                                                  | –                                                                                     | –                                                                                     |
| Cd(Ac) <sub>2</sub> [mmol]       | 1                                                                                   | –                                                                                   | 1                                                                                   | 1                                                                                    | 1                                                                                     | 1                                                                                     |
| L-cysteine [mmol]                | 8                                                                                   | 8                                                                                   | –                                                                                   | 8                                                                                    | 8                                                                                     | 8                                                                                     |
| Growth media                     | M9 media                                                                            | M9 media                                                                            | M9 media                                                                            | DI water                                                                             | M9 media                                                                              | DI water                                                                              |
| Photoluminescence under UV light |  |  |  |  |  |  |

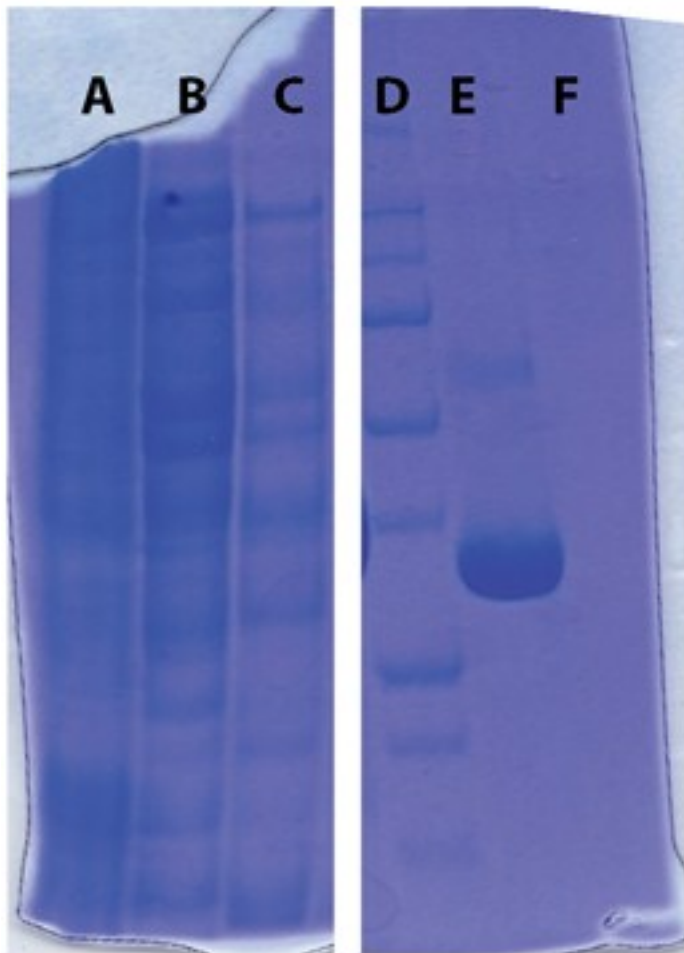

**Figure S1: Purification of biosynthetic QDs and comparison with control cell lysates.**

To demonstrate purity of the biosynthetic QDs, we collected an aliquot of QDs after purification from culture, and ran the sample on an SDS-PAGE gel. The QD sample had similar luminescent intensity to the images given in Figure 1, which ensures that the QD concentration was similar to that harvested from cell culture. A 50 mL sample of the purified QDs (lane F) resolved on the SDS-PAGE has no bands indicative of proteins or other macromolecules; therefore we conclude that no QDs are present at an appreciable concentration. For comparison, 50 mL samples of control lysates from *E. coli* (lane A), *S. maltophilia* (lane B) or recombinant protein overexpression in *E. coli* (lane E) are given, each of which contains numerous bands indicative of the specific proteins present; none of these patterns are observed in the purified QD sample (lane F). Lanes C and D show molecular weight ladders.
